# Supplementary material
Source: bioRxiv or medRxiv preprint supplement (https://www.biorxiv.org/highwire/filestream/9076/field_highwire_adjunct_files/0/020818-1.pdf)
Supplement: Supplementary file [file 020818-1.pdf]

1 **Supplementary material**

2

3

4 **Probing the fabric of the rare biosphere**

5

6

7

8

9 Bibiana G. Crespo\*, Philip J. Wallhead, Ramiro Logares and Carlos Pedrós-Alió

10

11

11 Supplementary Figure 1. OTU accumulation curves of the Western English Channel sample  
12 from Gibbons et al. (2013) (A) without singletons, as they analyzed it in the paper, and (B)  
13 with the singletons they removed for their analysis. The black line is the Weibull cumulative  
14 function fit ( $R^2=0.99$ ) for both OTU accumulation curves. The Akaike's information criterion  
15 (AIC) is indicated.

16

17

18

19

20

21

22

23

24

25

26

27

28

29

30

31

32

33

34

35 Supplementary Table 1. The three mathematical functions that best fit the species  
 36 accumulation curves and their goodness of fit. Coefficient of determination ( $R^2$ ), residual  
 37 sum of squares (RSS) and Akaike's information criterion (AIC) are shown.  $R^2$  in percentage  
 38 represents the model efficiency. The best fit corresponds to the highest  $R^2$  and the lowest  
 39 RSS and AIC, in this case found for the Weibull cumulative function. The parameters are  
 40 indicated by letters a, b and c.

| Function           |                    | Number of Parameters | Sample  | $R^2$ | RSS                  | AIC       |
|--------------------|--------------------|----------------------|---------|-------|----------------------|-----------|
| Michaelis-Menten   | (ax)/(b+x)         | 2                    | Surface | 0.984 | $5\,897 \times 10^2$ | 4\,979.17 |
|                    |                    |                      | Bottom  | 0.989 | $5\,325 \times 10^3$ | 6\,900.56 |
| Rational           | (a+bx)/(1+cx)      | 3                    | Surface | 0.997 | $1\,181 \times 10^2$ | 4\,174.13 |
|                    |                    |                      | Bottom  | 0.997 | $1\,139 \times 10^3$ | 6\,014.23 |
| Weibull Cumulative | $a(1-\exp(-bx))^c$ | 3                    | Surface | 0.999 | 2\,978               | 2\,326.46 |
|                    |                    |                      | Bottom  | 0.999 | 6\,670               | 3\,053.40 |

41

42

43

44

44 Supplementary Table 2. Isolates not matching the tag sequences. Isolates' closest relative  
 45 according to BLAST results, % of identity with the BLAST reference strain (identity  
 46 BLAST), GenBank accession number of the BLAST reference strain and number of isolates  
 47 of each taxa sequenced. *Actino* (*Actinobacteria*), *Bact* (*Bacteroidetes*), *Firm* (*Firmicutes*),  
 48 *Alpha-P* (*Alpha-Proteobacteria*) and *Gamma-P* (*Gamma-Proteobacteria*).

| Isolates' closest relative                          | Identity BLAST | GenBank accession number | Isolates number |
|-----------------------------------------------------|----------------|--------------------------|-----------------|
| <i>Microbacterium aquimaris</i> (Actino)            | 99.6 %         | HQ009858                 | 14              |
| <i>Thalassospira</i> sp. (Alpha-P)                  | 100 %          | EU440837                 | 12              |
| <i>Fulvimarina pelagi</i> (Alpha-P)                 | 96 %           | HQ622550                 | 8               |
| <i>Alcanivorax</i> sp. (Gamma-P)                    | 99.7 %         | AB681671                 | 6               |
| <i>Devosia subaequoris</i> (Alpha-P)                | 100 %          | JQ844475                 | 5               |
| <i>Alterierythrobacter</i> sp. (Alpha-P)            | 100 %          | FM177586                 | 4               |
| <i>Alteromonas macleodii</i> (Gamma-P)              | 99.9 %         | CP003917                 | 4               |
| <i>Erythrobacter</i> sp. (Alpha-P)                  | 100 %          | AB429073                 | 3               |
| <i>Brevundimonas</i> sp. (Alpha-P)                  | 99.9 %         | HQ830182                 | 2               |
| <i>Roseivirga spongicola</i> (Bact)                 | 99.8 %         | NR043531                 | 2               |
| <i>Devosia hwasunensis</i> (Alpha-P)                | 99 %           | HQ697727                 | 2               |
| Rhizobiales family (Alpha-P)                        | 96 %           | HQ622550                 | 2               |
| <i>Arthrobacter oxydans</i> (Actino)                | 100 %          | EU086823                 | 1               |
| <i>Emticicia</i> sp. (Bact)                         | 100 %          | JX426065                 | 1               |
| <i>Halomonas</i> sp. (Gamma-P)                      | 100 %          | HE586874                 | 1               |
| <i>Marinobacter hydrocarbonoclasticus</i> (Gamma-P) | 100 %          | JQ799097                 | 1               |
| <i>Nitratireductor</i> sp. (Alpha-P)                | 99.9 %         | AM981316                 | 1               |
| <i>Nocardioides marinus</i> (Actino)                | 99.9 %         | NR043787                 | 1               |
| <i>Pseudomonas</i> sp. (Gamma-P)                    | 99.9 %         | JN244973                 | 1               |
| <i>Sphingobium yanoikuyae</i> (Alpha-P)             | 99.9 %         | DQ659593                 | 1               |
| <i>Thalassospira permensis</i> (Alpha-P)            | 99.9 %         | FJ860275                 | 1               |
| <i>Alphaproteobacterium</i>                         | 99.8 %         | AY515421                 | 1               |
| <i>Martellella mediterranea</i> (Alpha-P)           | 99.8 %         | EU440955                 | 1               |
| Uncultured <i>Nitratireductor</i> sp. (Alpha-P)     | 99.7 %         | AM981316                 | 1               |

49

50

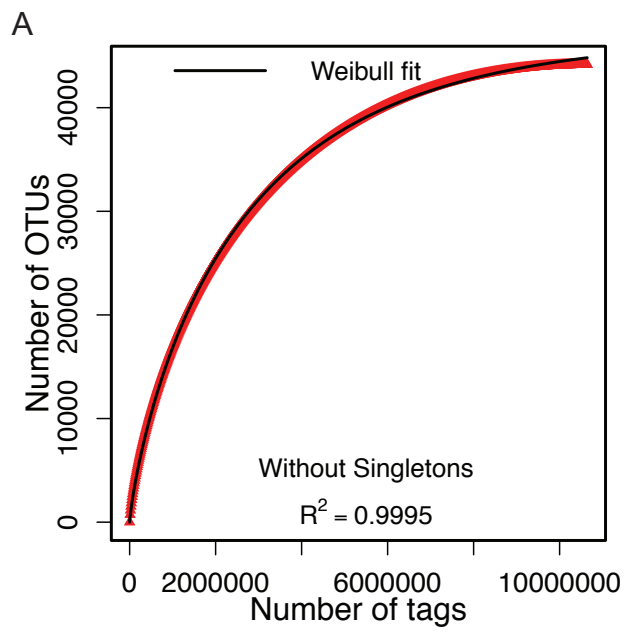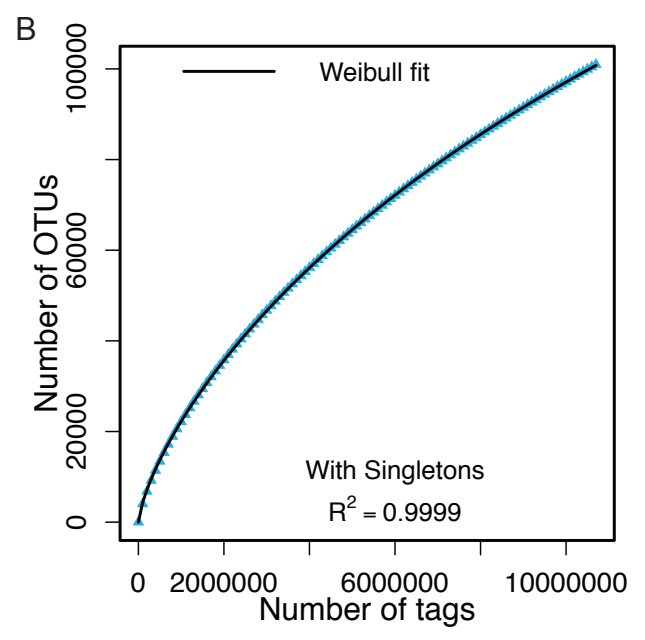

Supplementary Figure 1  
Crespo et al.
